# Supplementary material for: Identification and functional characterization of cis-regulatory elements in the apicomplexan parasite Toxoplasma gondii
Source: PubMed Central journal article supplement (PMC2688925; doi:10.1186/gb-2009-10-4-r34), 2009-04-07

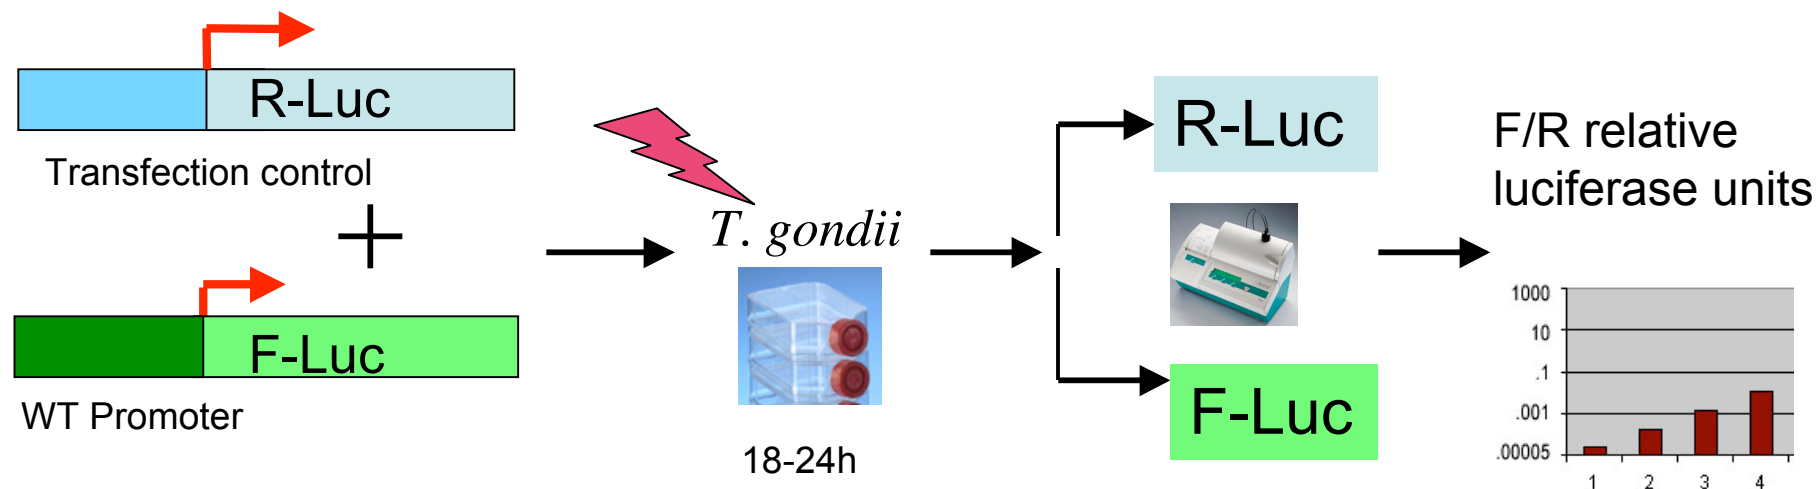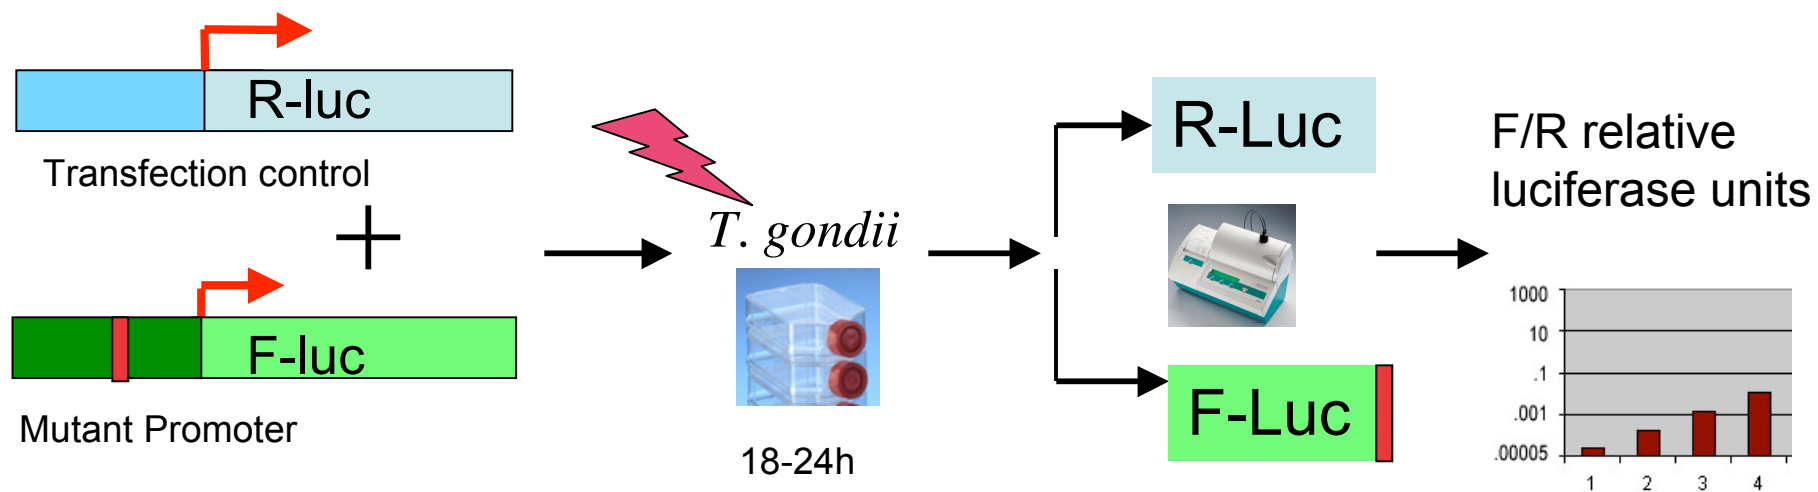

Supplement: gb-2009-10-4-r34-S2.pdf [file gb-2009-10-4-r34-S2.pdf]
